# Supplementary material for: Local finite-time Lyapunov exponent, local sampling and probabilistic source and destination regions
Source: Copernicus journal article supplement (doi:10.5194/npg-22-663-2015), 2015-11-11
Supplement: Supplementary file [file npg-22-663-2015-supplement-title-page.pdf › npg-22-663-2015-supplement-title-page.pdf]

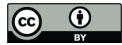

## *Supplement of*

# **Local finite-time Lyapunov exponent, local sampling and probabilistic source and destination regions**

**A. E. BozorgMagham et al.**

*Correspondence to:* A. E. BozorgMagham (bozorgmagham@gmail.com)

- [npg-22-663-2015-supplement-title-page.pdf](#)
- [Fig\\_15\\_movie.wmv](#)

The copyright of individual parts of the supplement might differ from the CC-BY 3.0 licence.
